# Supplementary material for: Boosting the supercapacitive properties of polypyrrole with chitosan and hybrid silver nanoparticles/nanoclusters
Source: Royal Society of Chemistry journal article supplement (doi:10.1039/c6ra13697d), 2016-01-01
Supplement: c6ra13697d1.pdf [file c6ra13697d1.pdf]

## Boosting the supercapacitive properties of polypyrrole with chitosan and hybrid silver nanoparticle/nanocluster

John Kevin Gan,<sup>1</sup> Yee Seng Lim,<sup>1</sup> Nay Ming Huang,<sup>1\*</sup> Hong Ngee Lim<sup>2,3</sup>

<sup>1</sup>Low Dimensional Materials Research Centre, Department of Physics, Faculty of Science,  
University of Malaya, 50603 Kuala Lumpur, Malaysia

<sup>2</sup>Department of Chemistry, Faculty of Science, Universiti Putra Malaysia,  
43400 UPM Serdang, Selangor, Malaysia

<sup>3</sup>Functional Device Laboratory, Institute of Advanced Technology, Universiti Putra Malaysia,  
43400 UPM Serdang, Selangor, Malaysia

Corresponding author: huangnayming@um.edu.my (Huang N.M.)

### Calculation

#### *Three-electrode configuration*

The specific capacitance was calculated from the galvanostatic charge/discharge (GCD) curves using equation (1).

$$C_m = I\Delta t/m\Delta V \quad (1)$$

where  $C_m$  is the specific capacitance in farads per gram,  $I$  is the discharge current,  $\Delta t$  is the discharge time,  $m$  is the mass of the active materials in the electrode and  $\Delta V$  is the potential window.

#### *Two-electrode configuration*

A symmetric supercapacitor cell was assembled using a Teflon Swagelok® construction with two equal Ag@PPy/CS electrodes. The separator is a piece of filter paper soaked with 1.0 M H<sub>2</sub>SO<sub>4</sub> electrolyte. The specific capacitance was calculated according to equation (2)

$$C_m = 4C/m \quad (2)$$

where  $C$  is the experimental measured capacitance of the supercapacitor device, and  $m$  is total mass of the active materials in both electrodes. Electrochemical impedance spectroscopy (EIS) was carried out with a perturbation amplitude of 5 mV versus the open-circuit potential within a frequency range of 100 kHz to 0.1 Hz. The energy and power density of the symmetric supercapacitor were calculated from the GCD measurements by employing equations (3) and (4), respectively.

$$E_{cell} = C_{cell}V^2/2 \quad (3)$$

$$P_{cell} = E_{cell}/\Delta t \quad (4)$$

where  $E_{cell}$  is the energy density ( $\text{W h kg}^{-1}$ ),  $C_{cell}$  is the specific capacitance of the cell,  $V$  is the working potential window,  $P_{cell}$  is the power density ( $\text{W kg}^{-1}$ ), and  $\Delta t$  is the discharge time.

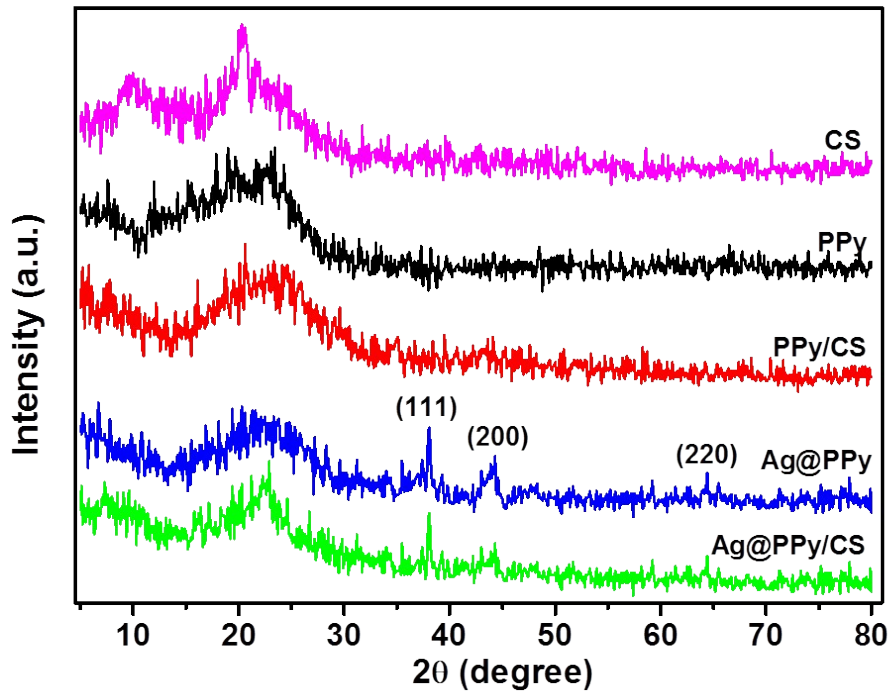

**Figure S1:** X-ray diffraction patterns of CS, PPy, PPy/CS, Ag@PPy and Ag@PPy/CS nanocomposites.
